# Supplementary material for: Responses of flavonoid profile and associated gene expression to solar blue and UV radiation in two accessions of Vicia faba L. from contrasting UV environments
Source: Royal Society of Chemistry journal article supplement (doi:10.1039/c8pp00567b), 2019-01-04
Supplement: c8pp00567b1.pdf [file c8pp00567b1.pdf]

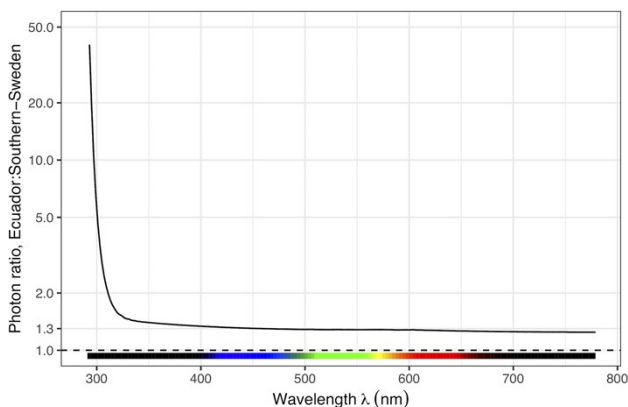

Supplementary figure 1. The photon ratio between the estimated yearly maximum spectral irradiances of sunlight in the Andean region of Ecuador and in southern Sweden at solar noon under clear sky conditions, calculated with Quick TUV Calculator (see Methods for details).

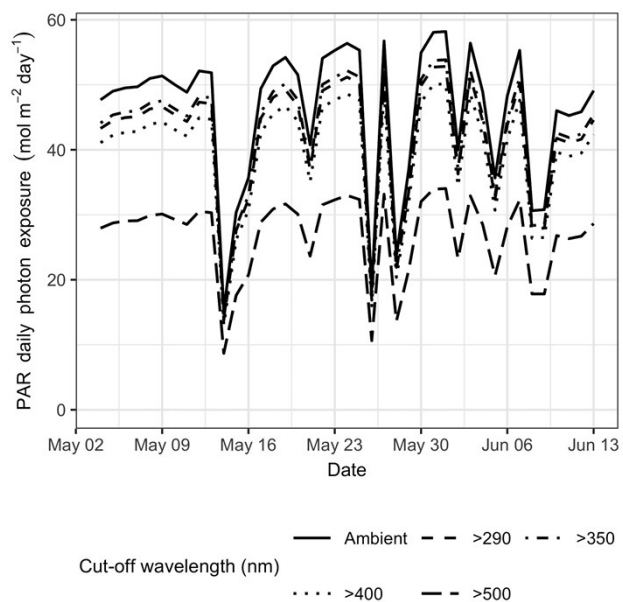

Supplementary figure 2. Photosynthetically active radiation (PAR) daily photon exposure throughout the experiment. “Ambient” is unfiltered sunlight, included here for comparison to the filter treatments used. Calculated as described in Methods.

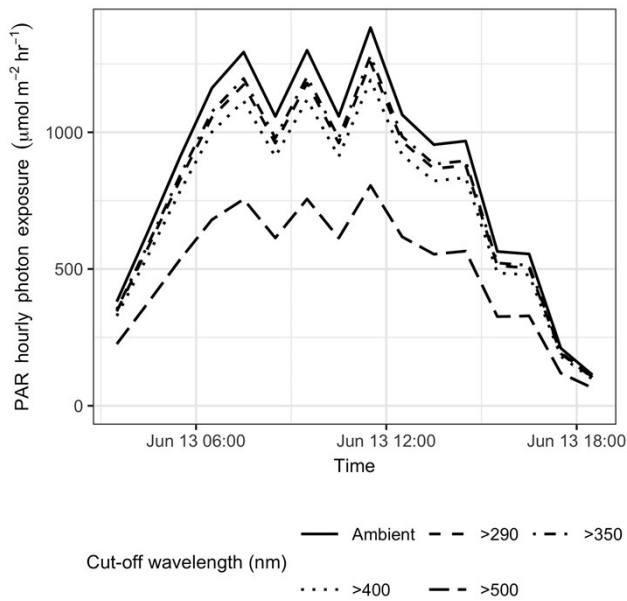

Supplementary figure 3. Photosynthetically active radiation (PAR) mean hourly photon irradiance during the last day of the experiment, when leaves were sampled for metabolite and gene transcript measurements. “Ambient” is unfiltered sunlight, included here for comparison to the filter treatments used. Calculated as described in Methods.

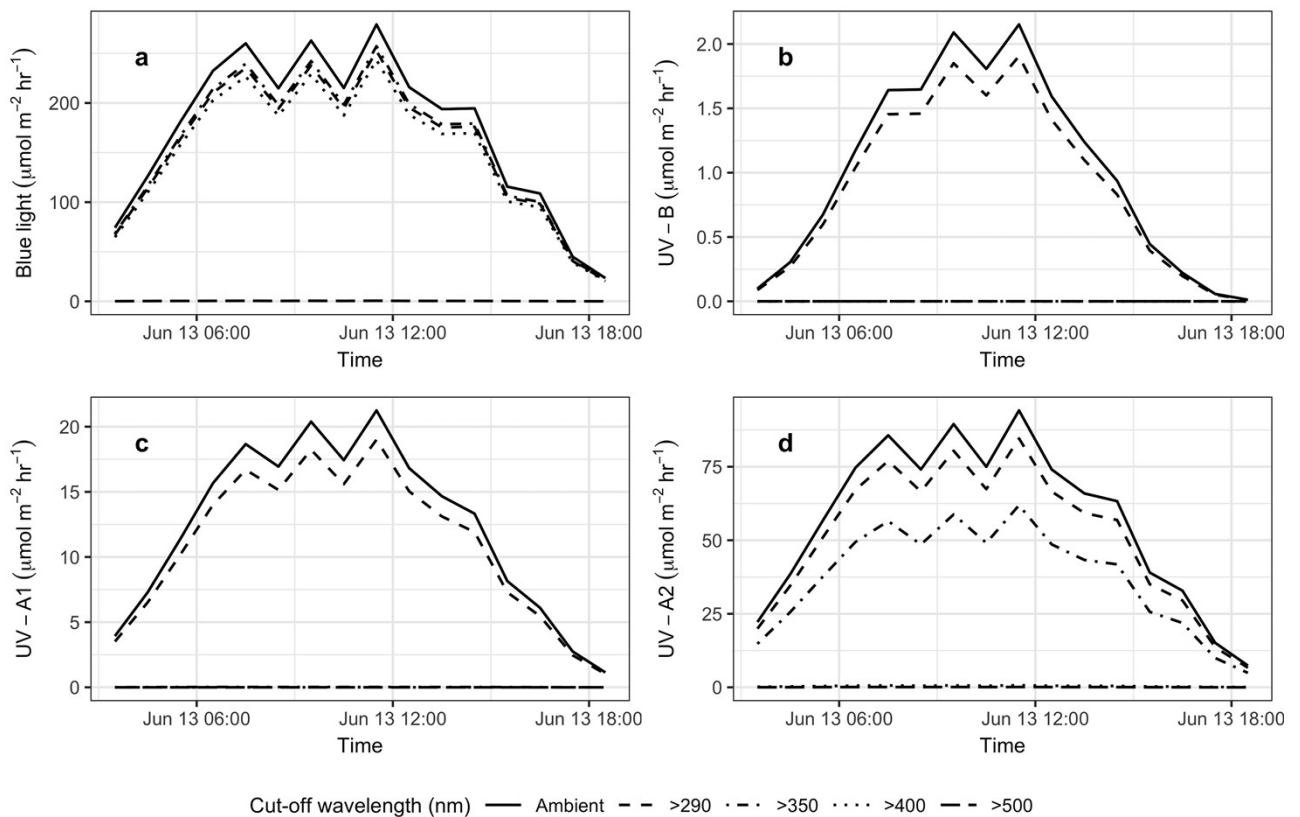

Supplementary figure 4. Mean hourly photon irradiance for selected regions of the solar spectrum during the last day of the experiment, when leaves were sampled for metabolite and gene transcript measurements. a. Blue light (400–500 nm); b. UV-B (290–315 nm); c. UV-A1 (315–340 nm); d. UV-A2 (340–400 nm). “Ambient” is unfiltered sunlight, included here for comparison to the filter treatments used. Calculated as described in Methods.

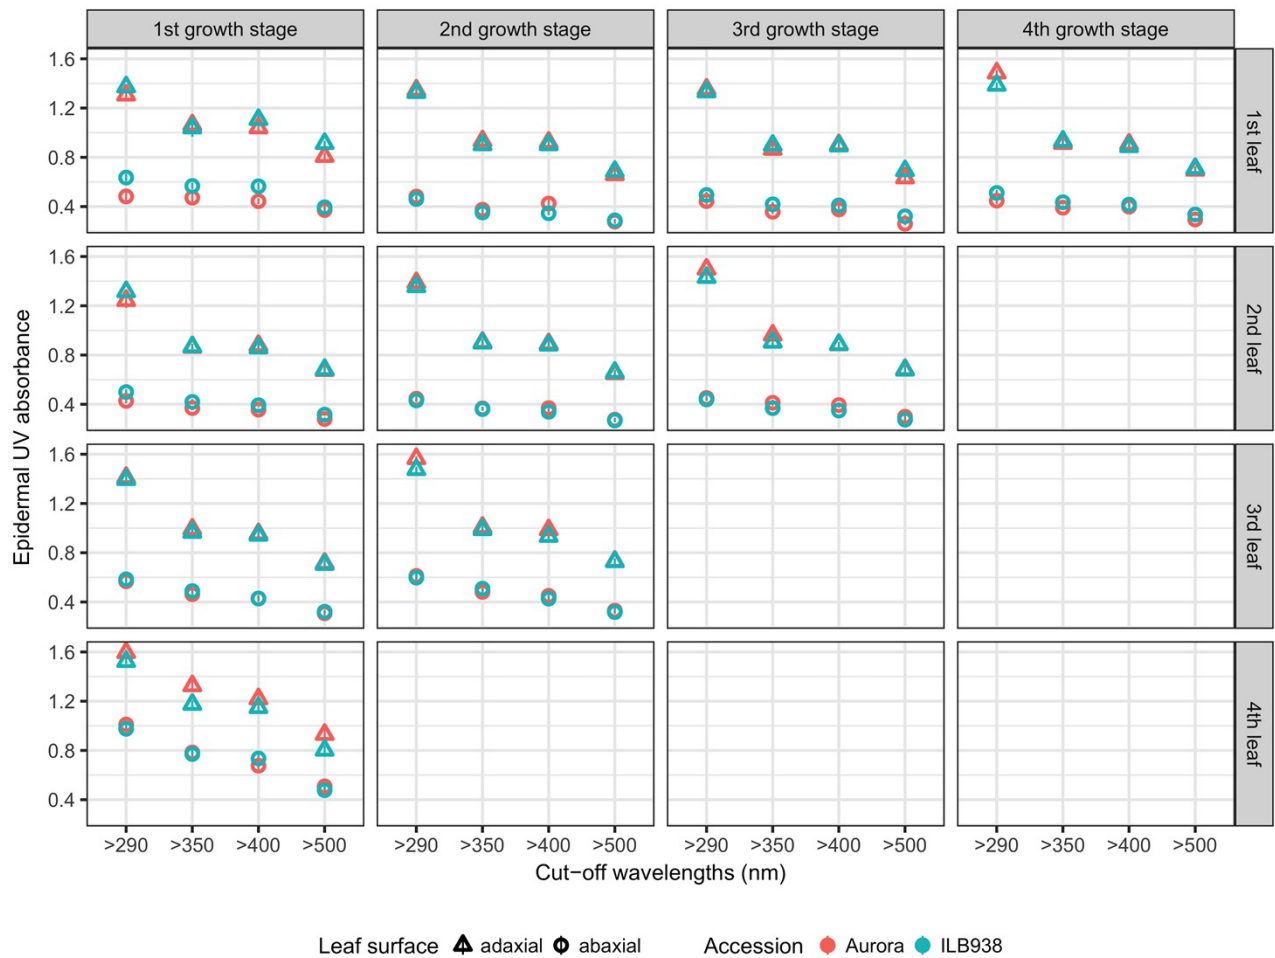

Supplementary figure 5. Absorbance of epidermal flavonoids per unit area in plants of accessions Aurora and ILB938 of *V. faba* grown in sunlight under four filters, assessed with Dualex on four dates (14 d, 19 d, 24 d and 29 d after plant emergence). At each date, the youngest fully expanded leaf was measured for the first time, and all leaves measured on previous dates were measured again. Stage 1 = full expansion, Stage 2 = full expansion + 5 d, Stage 3 = full expansion + 10 d, and Stage 4 = full expansion + 15 d. Means ( $\pm$ SE) of replicate blocks, 163 measured plants in total. Labels at the top of the panel columns indicate different leaf growth stage. The youngest expanded leaves measured for the first time on the last date were harvested on the next day for phenolic analysis by HPLC.

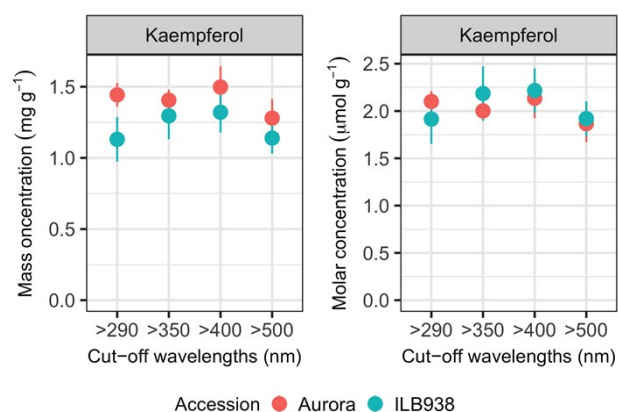

Supplementary figure 6. Comparison of total kaempferol mass concentration and molar concentration in plants of accessions Aurora and ILB938 of *V. faba* grown in sunlight under four filters. All values are means  $\pm$ SE of four replicate blocks, 163 sampled plants in total.

Supplementary table 1. Estimated yearly maximum UV-B, UV-A and PAR irradiance, UVA:PAR, UVB:PAR ratio and biologically effective UV irradiances calculated with five BSWFs for the Andean region of Ecuador and for southern Sweden where accessions ILB938 and Aurora of *V.faba* originated.

| Location         | UVB ( $\mu\text{mol m}^{-2}\text{s}^{-1}$ ) | UVA ( $\mu\text{mol m}^{-2}\text{s}^{-1}$ ) | PAR ( $\mu\text{mol m}^{-2}\text{s}^{-1}$ ) | UVB:PAR |
|------------------|---------------------------------------------|---------------------------------------------|---------------------------------------------|---------|
| Ecuadorian Andes | 7.6                                         | 208                                         | 2270                                        | 0.33%   |
| Southern Sweden  | 3.5                                         | 150                                         | 1800                                        | 0.20%   |

  

| Location         | UVA:PAR | GEN(G) ( $\text{W m}^{-2}\text{s}^{-1}$ ) | FLAV ( $\text{W m}^{-2}\text{s}^{-1}$ ) | DNA(P) ( $\text{W m}^{-2}\text{s}^{-1}$ ) |
|------------------|---------|-------------------------------------------|-----------------------------------------|-------------------------------------------|
| Ecuadorian Andes | 9.2%    | 0.75                                      | 1.3                                     | 2.0                                       |
| Southern Sweden  | 8.4%    | 0.25                                      | 0.6                                     | 1.1                                       |

Estimated UVB, UVA and PAR radiation, UVA:PAR, UVB:PAR ratio and biologically effective UV doses for Ecuador and Southern Sweden using BSWFs (biological spectral weighting functions). GEN(G) is the generalized plant action spectrum of Caldwell 1971 with Green's formulation. FLAV is the action spectrum for the accumulation of the flavonoid mesembryanthin in *Mesembryanthemum crystallinum*. DNA(P) is the action spectrum for DNA damage in alfalfa (*Medicago sativa*) seedlings. All spectra were normalized at 300 nm.

Supplementary table 2. Genes chosen for q-PCR analysis, primers designed to quantify these genes, and a brief description of gene function.

| Primers            | Sequence (5' $\rightarrow$ 3')                | Gene name            | Description of gene function                                                                                      |
|--------------------|-----------------------------------------------|----------------------|-------------------------------------------------------------------------------------------------------------------|
| HY5 for<br>HY5 rev | GAGGGAGAGGAAAAAGGCATA<br>GCTCGCAGTTGTGTTCTTCA | elongated hypocotyl5 | Encodes basic leucine zipper (bZIP) transcription factor, involved in light-regulated transcriptional activation. |
| CHS for<br>CHS rev | CAGAGGCTGAGTCTGCAGTT<br>GCCAGACTCTGTTTTGCTGC  | chalcone synthase    | Encodes chalcone synthase, a key enzyme in biosynthesis pathway of flavonoids                                     |
| CHI for<br>CHI rev | CCGTTCCACCAGCAAACAG<br>GCCAGACTCTGTTTTGCTGC   | chalcone isomerase   | Encodes chalcone isomerase, which catalyzes the conversion of chalcone to flavanones                              |

|                        |                                                  |                                         |                                                                                                                 |
|------------------------|--------------------------------------------------|-----------------------------------------|-----------------------------------------------------------------------------------------------------------------|
| DOGT1 for<br>DOGT1 rev | GGTTGGGCTCCTCAGTTGTT<br>GGCCATGTAACCATTGGCAC     | don-glucosyltransferase<br>1            | Encodes a DON-Glucosyltransferase,<br>having quercetin glucosyltransferase<br>activity                          |
| ABI2 for<br>ABI2 rev   | AGAGGACTGACAGTGAAATCGAA<br>GTTTGAGTCCTGCGGCAAAG  | aba insensitive 2                       | Encodes a protein phosphatase 2C<br>that negatively regulates the abscisic<br>acid-activated signalling pathway |
| IAA5 for<br>IAA5 rev   | AGGATGGTGATTGGATGCTC<br>TTCCATAGCTCGAGGTGCT      | auxin-inducible 2-27                    | Encodes a transcription factor<br>involved in the auxin-activated<br>signaling pathway                          |
| TAT3 for<br>TAT3 rev   | CAGCAAAAATGCTTGAACA<br>CTCCCATAGGCACAAAAGGA      | tyrosine<br>aminotransferase 3          | Encodes a tyrosine aminotransferase<br>that responds to jasmonic acid and<br>wounding                           |
| Reference<br>genes     |                                                  |                                         |                                                                                                                 |
| CYP2 for<br>CYP2 rev   | TGCCGATGTCCTCCAGAA<br>CAGCGAAGTTGGAACCGTAGA      | cyclophilin 20-3                        |                                                                                                                 |
| ELF1A for<br>ELF1A rev | GTGAAGCCCGGTATGCTTGT<br>CTTGAGATCCTTGACTGCAACATT | eukaryotic elongation<br>factor 1-alpha |                                                                                                                 |

Supplementary table 3. Flavonoid and phenolic acid compounds identified by HPLC-MS<sup>n</sup> in the leaves of accessions Aurora and ILB938 of *V. faba*, retention times (RT), molecular masses (M+1).

| Compound name                                                | RT (min) | M+1 (g mol <sup>-1</sup> ) |
|--------------------------------------------------------------|----------|----------------------------|
| Kaempferol-3-O-rhamnoside                                    | 26.46    | 432.386                    |
| Kaempferol-3-O-arabinoside-7-O-rhamnoside                    | 16.14    | 564.616                    |
| Kaempferol-3-O-rhamnoside-7-O-rhamnoside                     | 19.63    | 578.543                    |
| Kaempferol-3-O-galactoside-7-O-rhamnoside                    | 13.71    | 594.542                    |
| Kaempferol-3-O-rhamnoglucoside                               | 19.05    | 594.542                    |
| Kaempferol-3-O-acetyl-galactoside-7-O-rhamnoside             | 20.29    | 636.592                    |
| Kaempferol-3-O-rhamnoarabinoside-7-O-rhamnoside              | 14.38    | 710.773                    |
| Kaempferol-3-O-rhamnogalactoside-7-O-rhamnoside              | 10.2     | 740.699                    |
| Kaempferol-3-O-rhamnoglucoside-7-O-rhamnoside                | 10.7     | 740.699                    |
| Kaempferol-3-O-acetyl-rhamnogalactoside-7-O-rhamnoside       | 16.46    | 782.761                    |
| Kaempferol-3-O-rhamnoglucoside-7-O-rhamnoside-4' -rhamnoside | 9.65     | 886.855                    |
| Quercetin-3-O-rhamnoside-7-O-rhamnoside                      | 15.55    | 594.549                    |
| Quercetin-3-O-rhamnoside-7-O-galactoside                     | 12.03    | 610.549                    |
| Quercetin-3-O-rhamnoglucoside                                | 19.05    | 610.549                    |
| Quercetin-3-O-acetyl-galactoside-7-O-rhamnoside              | 17.6     | 652.598                    |
| Quercetin-3-O-rhamnoarabinoside-7-O-rhamnoside               | 13.07    | 726.779                    |
| Quercetin-3-O-rhamnogalactoside-7-O-rhamnoside               | 8.85     | 756.705                    |
| Quercetin-3-O-rhamnoglucoside-7-O-rhamnoside                 | 9.21     | 756.705                    |
| Quercetin-3-O-rhamnorhamnogalactoside                        | 11.21    | 756.705                    |
| Caffeoyl-glucoside                                           | 5.53     | 342.300                    |

---

|                    |      |         |
|--------------------|------|---------|
| Feruloyl-glucoside | 7.51 | 386.353 |
| Sinapoyl-glucoside | 7.11 | 356.327 |
| Unknown1           | 6.49 | 595     |
| Unknown2           | 6.77 | 595     |

---
